# Supplementary material for: Immediate replacement of fishing with dairying by the earliest farmers of the northeast Atlantic archipelagos
Source: PubMed Central journal article supplement (PMC4027381; doi:10.1098/rspb.2013.2372), 2014-04-07
Supplement: rspb20132372supp1.pdf [file rspb20132372supp1.pdf]

**Supplementary materials to:**

**Immediate replacement of fishing with dairying by the earliest farmers of the NE**

**Atlantic archipelagos**

Lucy J E Cramp, Jennifer Jones, Alison Sheridan, Jessica Smyth, Helen Whelton, Jacqui

Mulville, Niall Sharples & Richard P Evershed

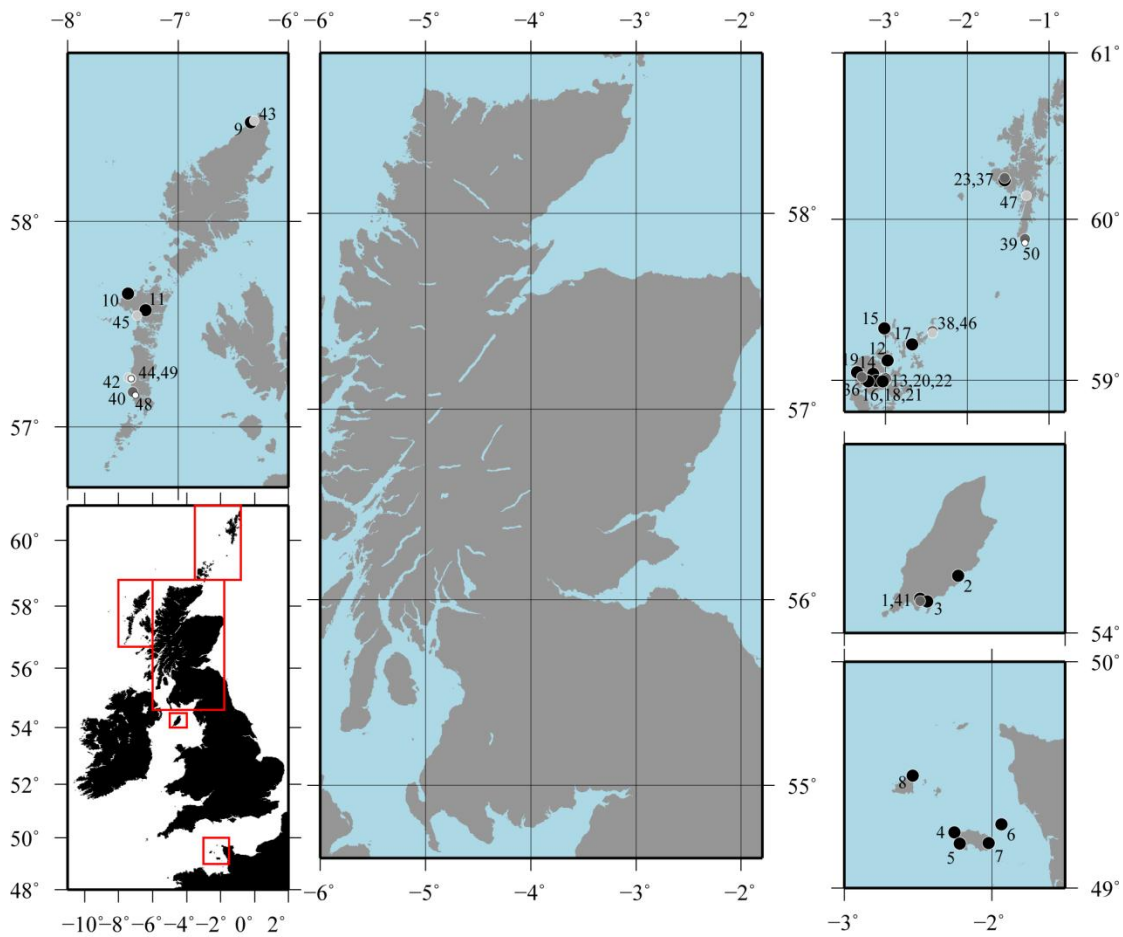

| Key                    |                      |                          |                         |                  |                   |
|------------------------|----------------------|--------------------------|-------------------------|------------------|-------------------|
| Neolithic              | 10 Loch Olabhat      | 20 Stonehall             | 30 Maybole              | 38 Toft's Ness   | 46 Toft's Ness    |
| 1 Billown              | 11 Bharpa Langais    | 21 Stones of Stennes     | 31 Mountcastle Quarry   | 39 Sumburgh      | 47 Scalloway      |
| 2 Glencrutchery        | 12 Braes o' Habreck  | 22 Wideford Hill         | 32 Powmyre Quarry       | 40 Cladh Hallan  |                   |
| 3 Ronaldsway           | 13 Crossiecrown      | 23 Scord of Brouster     | 33 The Hirsell          | 41 Billown       | Viking/Norse      |
| 4 Le Pinacle           | 14 Knowes of Trotty  | 24 Culduthel             | 34 Upper Forth Crossing | 42 Dun Vulcan    | 48 Cille Pheadair |
| 5 Les Blanchés Banques | 15 Links of Noltland | 25 Doon Hill             | 35 Lanton Quarry        | 43 Dun Arnistean | 49 Bornais        |
| 6 Les Ecrehous         | 16 Ness of Brodgar   | 26 Girvan Warehouse      |                         | 44 Bornais       | 50 Jarlshof       |
| 7 Mont Orgueil         | 17 Pool              | 27 Knocknab              | Bronze Age              |                  |                   |
| 8 Les Fouillages       | 18 Quanterness       | 28 Lesmurdie Road, Elgin | 36 Linga Field          |                  |                   |
| 9 Dunasbroc            | 19 Skara Brae        | 29 Lockerbie             | 37 Scord of Brouster    | 45 Baile Sear    |                   |

**Supplementary figure S1.** Map showing location of sites in northern Britain, the Channel Isles and the Isle of Man.

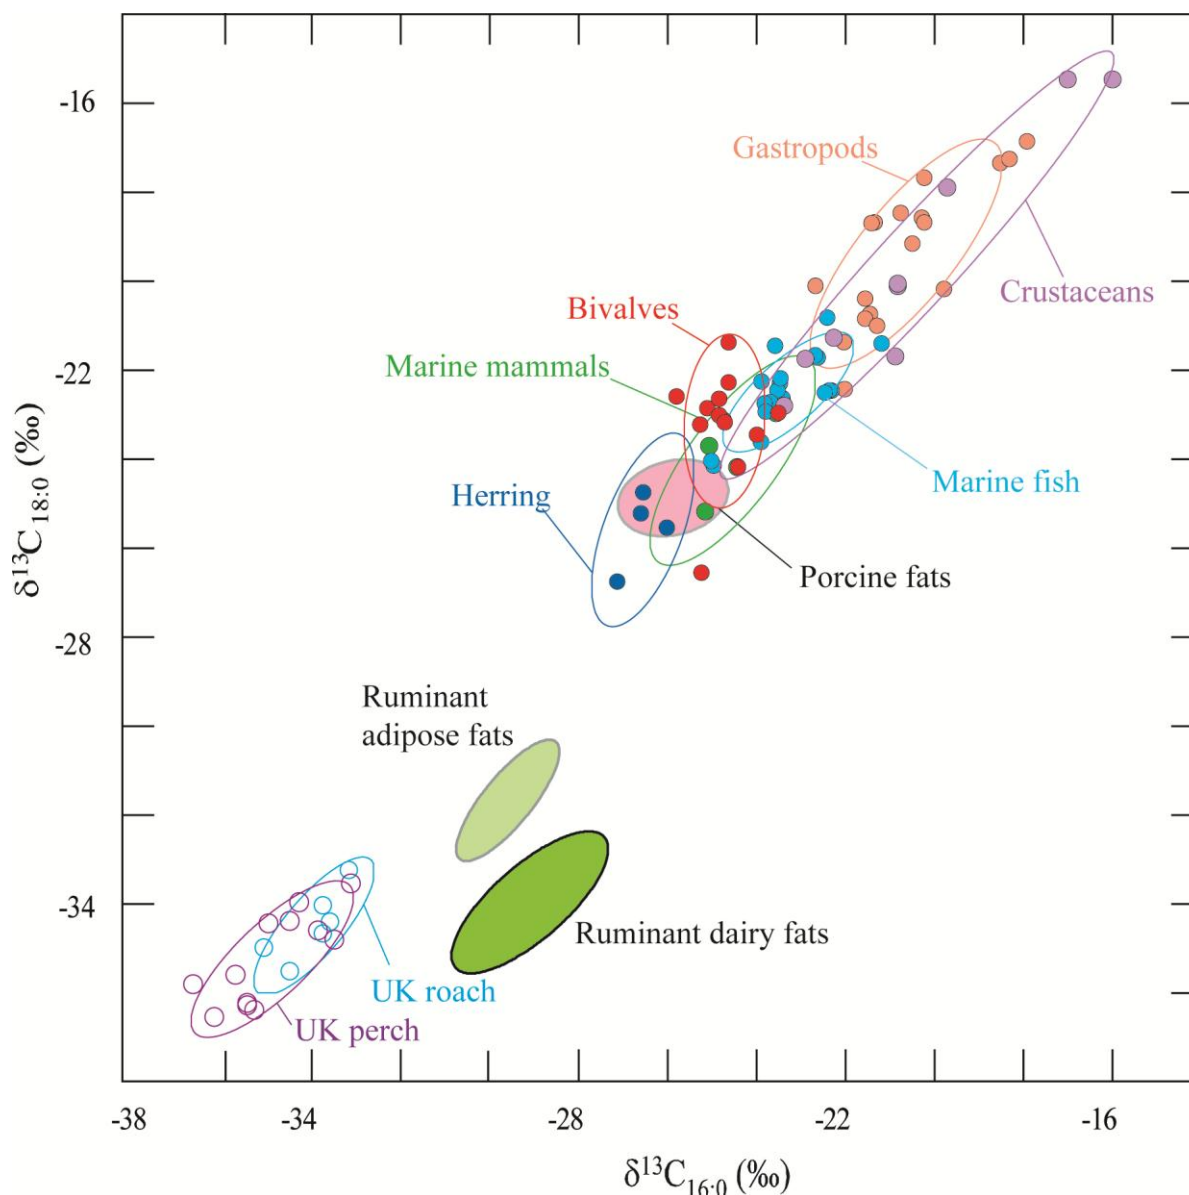

**Supplementary figure S2.** Plot of  $\delta^{13}\text{C}$  values of individual *n*-alkanoic acids from various terrestrial and aquatic fauna collected from the UK shown with 1 s.d. confidence ellipses [1]. Reference fats were either hand-collected or sourced *via* fish merchants from a range of unfarmed locations, including the English Channel, the Severn Estuary and the North Sea. Specimens were frozen until required. Samples of tissue were removed and freeze-dried to constant weight prior to lipid extraction using 3 x 10 ml  $\text{CHCl}_3/\text{MeOH}$  (2:1 v/v). Approximately 2 mg lipid was then hydrolysed and methylated prior to analysis using GC, G/MS and GC/C/IRMS as described above. Modern reference fats were corrected for the effects of post-industrial carbon (+ 1.3 ‰; [2]).

## References

- (1) Cramp LJE, Evershed RP. 2014 Reconstructing Aquatic Resource Exploitation in Human Prehistory using Lipid Biomarkers and Stable Isotopes. In *Treatise on Geochemistry 2<sup>nd</sup> edition, Vol. 14* (eds. HD Holland, KK Turekian), pp. 319 – 339. Oxford: Elsevier.
  
- (2) Friedli H, Lotscher H, Oeschger H, Siegenthaler U, Stauffer B. 1986 Ice Core Record of the C-13/C-12 Ratio of atmospheric CO<sub>2</sub> in the past two centuries. *Nature* **324**, 237-238.

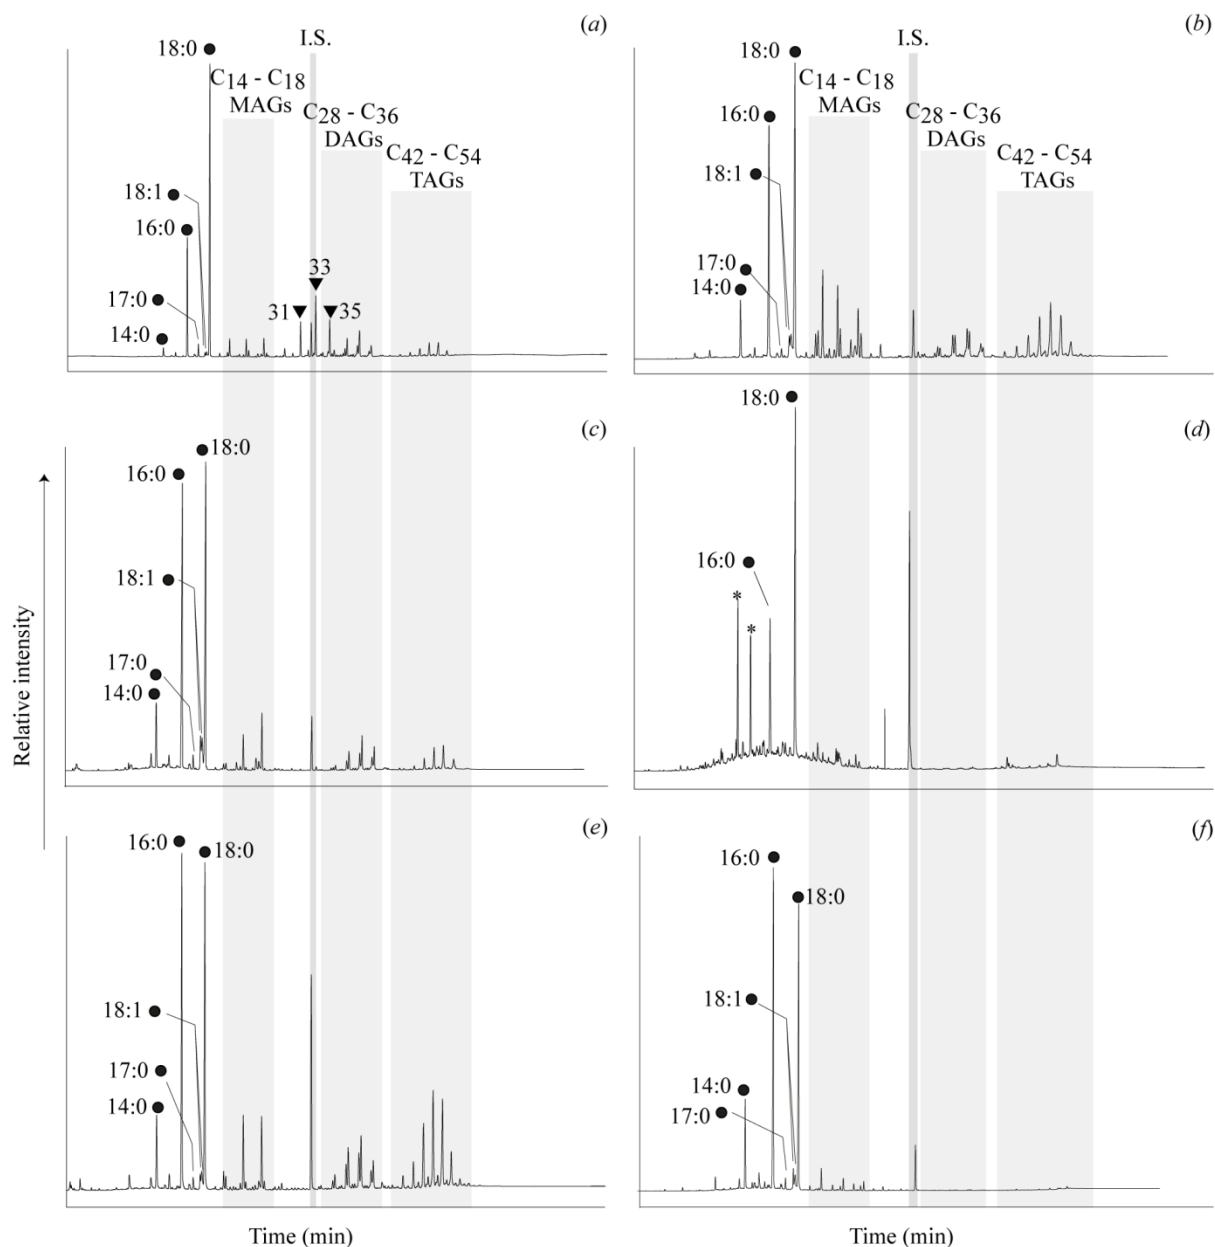

**Supplementary figure S3.** Partial high temperature gas chromatograms from organic residues from Neolithic pot sherds from (a) Culduthel, Invernesshire, (b) Dunasbroc, Isle of Lewis, (c) Billown, Isle of Man, (d) Les Fouaillages, Guernsey, (e) Braes o’Habreck, Wyre and (f) Scord of Brouster, Shetland. Filled circles – free fatty acid with x carbon atoms and y degree of unsaturation, *filled triangles* – mid-chain ketone with x carbon atoms, MAGs – monoacylglycerols, DAGs – diacylglycerols, TAGs – triacylglycerols, I.S. – internal standard ( $C_{34}$  n-alkane). Time retention windows are from 5 - 42 min.

**Supplementary table S1.** Table showing fragment ions selected for GC/MS-SIM for detection of C<sub>16</sub> – C<sub>22</sub> APAAs.

|                     | 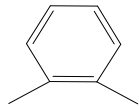 |                            |
|---------------------|-----------------------------------------------------------------------------------|----------------------------|
| <b>Chain length</b> | <b>Base peak (m/z)</b>                                                            | <b>M<sup>+</sup> (m/z)</b> |
|                     |                                                                                   |                            |
| 16                  | 105                                                                               | 262                        |
| 18                  | 105                                                                               | 290                        |
| 20                  | 105                                                                               | 318                        |
| 22                  | 105                                                                               | 346                        |

**Supplementary table S2.** Major fragment and  $[M-15]^+$  ions used for GC/MS-SIM of the vicinal diols with carbon chain lengths of 18 to 22. The fragment ions of the major positional isomers are highlighted in grey.

|                       | 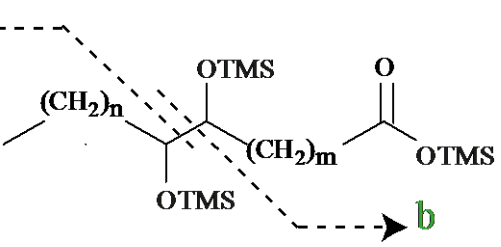 |     |              |  |
|-----------------------|------------------------------------------------------------------------------------|-----|--------------|--|
| Dihydroxy acid        | a                                                                                  | b   | $[M - 15]^+$ |  |
|                       | <i>m/z</i>                                                                         |     |              |  |
| 9,10-C <sub>18</sub>  | 215                                                                                | 317 | 517          |  |
| 11,12-C <sub>18</sub> | 187                                                                                | 345 | 517          |  |
| 13,14-C <sub>18</sub> | 159                                                                                | 373 | 517          |  |
| 9,10-C <sub>20</sub>  | 243                                                                                | 317 | 545          |  |
| 11,12-C <sub>20</sub> | 215                                                                                | 345 | 545          |  |
| 11,12-C <sub>22</sub> | 243                                                                                | 345 | 573          |  |
| 13,14-C <sub>22</sub> | 215                                                                                | 373 | 573          |  |

**Supplementary table S3.** List of sherds from coastal sites investigated for aquatic biomarkers

| Sherd                                                                | $\delta^{13}\text{C}_{16:0}$ | $\delta^{13}\text{C}_{18:0}$ | $\Delta^{13}\text{C}$ | Aquatic biomarkers |
|----------------------------------------------------------------------|------------------------------|------------------------------|-----------------------|--------------------|
| CHANNEL ISLES/NORMANDY TRADITION NEOLITHIC                           |                              |                              |                       |                    |
| EARLY NEOLITHIC <i>Villeneuve-Saint-Germain, Pinnacle-Fouillages</i> |                              |                              |                       |                    |
| <b>Les Fouillages, Guernsey</b>                                      |                              |                              |                       |                    |
| LF1                                                                  | -29.8                        | -33.4                        | -3.5                  | (-)                |
| LF4                                                                  | -28.3                        | -33.5                        | -5.2                  | (-)                |
| LF5                                                                  | -27.0                        | -31.3                        | -4.3                  | (-)                |
| EARLY MID NEOLITHIC <i>Cerny- and early Castellic-type</i>           |                              |                              |                       |                    |
| <b>Les Blanches Banques, Jersey</b>                                  |                              |                              |                       |                    |
| LBB1                                                                 | -26.8                        | -29.6                        | -2.8                  | (-)                |
| LBB2                                                                 | -27.9                        | -31.3                        | -3.4                  | (-)                |
| <b>Mont Orgueil, Jersey</b>                                          |                              |                              |                       |                    |
| MOG1                                                                 | -27.4                        | -32.6                        | -5.2                  | (-)                |
| MOG3                                                                 | -27.9                        | -31.2                        | -3.3                  | (-)                |
| MOG4                                                                 | -27.9                        | -32.9                        | -5.1                  | (-)                |
| NEOLITHIC BRITAIN AND ISLE OF MAN                                    |                              |                              |                       |                    |
| <i>Carinated Bowl, modified Carinated Bowl, Mull Hill ware</i>       |                              |                              |                       |                    |
| EARLY NEOLITHIC                                                      |                              |                              |                       |                    |
| <b>Mainland Northern Britain</b>                                     |                              |                              |                       |                    |
| <b>Maybole, Ayrshire</b>                                             |                              |                              |                       |                    |
| MB3                                                                  | -26.9                        | -30.4                        | -3.5                  | (-)                |
| MB4                                                                  | -28.3                        | -34.2                        | -5.9                  | (-)                |
| MB5                                                                  | -27.6                        | -32.7                        | -5.2                  | (-)                |
| MB6                                                                  | -29.2                        | -33.6                        | -4.4                  | (-)                |
| <b>Lockerbie, Dumfries &amp; Galloway</b>                            |                              |                              |                       |                    |
| LK1                                                                  | -27.8                        | -33.1                        | -5.3                  | (-)                |
| LK3                                                                  | -28.5                        | -33.2                        | -4.7                  | (-)                |
| <b>Doon Hill East Lothian</b>                                        |                              |                              |                       |                    |
| DH1                                                                  | -27.3                        | -32.7                        | -5.4                  | (-)                |



|                                         |       |       |      |                       |
|-----------------------------------------|-------|-------|------|-----------------------|
| DH4                                     | -27.2 | -33.3 | -6.2 | (-)                   |
| <b>Lesmurdie Road, Elgin,<br/>Moray</b> |       |       |      |                       |
| LR1                                     | -27.6 | -29.1 | -1.6 | LC APAAs, LC<br>DHYAs |
| <b>The Hirsell, Roxburghshire</b>       |       |       |      |                       |
| HIR1                                    | -28.6 | -32.2 | -3.6 | (-)                   |
| HS1                                     | -27.6 | -30.9 | -3.3 | (-)                   |
| HS2                                     | -27.0 | -32.9 | -5.8 | (-)                   |
| <b>Girvan Warehouse, Ayrshire</b>       |       |       |      |                       |
| GIR1                                    | -29.0 | -32.8 | -3.8 | (-)                   |
| GIR3                                    | -27.7 | -32.5 | -4.8 | (-)                   |
| GIR4                                    | -29.7 | -34.6 | -4.9 | (-)                   |
| GIR5                                    | -29.3 | -35.7 | -6.4 | (-)                   |
| GIR7                                    | -28.4 | -34.1 | -5.6 | (-)                   |
| GIR11M                                  | -28.8 | -33.0 | -4.2 | (-)                   |
| GIR11R                                  | -31.0 | -32.7 | -1.7 | (-)                   |
| <b>Knocknab, Luce Sands</b>             |       |       |      |                       |
| KN1                                     | -26.4 | -32.0 | -5.6 | (-)                   |
| KN3                                     | -24.6 | -26.8 | -2.2 | (-)                   |
| <b>Lanton Quarry, Northumberland</b>    |       |       |      |                       |
| LAN1                                    | -28.7 | -34.2 | -5.5 | (-)                   |
| LAN2                                    | -28.1 | -32.6 | -4.6 | (-)                   |
| LAN3                                    | -27.2 | -30.1 | -2.9 | (-)                   |
| LAN4                                    | -28.1 | -30.4 | -2.3 | (-)                   |
| LAN5                                    | -28.0 | -34.1 | -6.1 | (-)                   |
| LAN6R                                   | -28.1 | -33.2 | -5.1 | (-)                   |
| LAN10V1                                 | -28.1 | -33.4 | -5.4 | (-)                   |
| LAN10V2                                 | -29.7 | -32.8 | -3.1 | (-)                   |
| LAN15                                   | -28.1 | -32.4 | -4.3 | (-)                   |
| LAN16                                   | -27.6 | -33.2 | -5.6 | (-)                   |
| LAN20                                   | -28.2 | -32.9 | -4.8 | (-)                   |
| LAN22                                   | -27.5 | -33.2 | -5.7 | (-)                   |
| LAN23                                   | -27.8 | -33.4 | -5.6 | (-)                   |
| LAN25                                   | -27.0 | -32.9 | -5.9 | (-)                   |
| LAN28R                                  | -27.4 | -31.8 | -4.4 | (-)                   |
| LAN28M                                  | -28.9 | -31.6 | -2.7 | (-)                   |
| LAN29                                   | -27.3 | -33.2 | -5.9 | (-)                   |
| LAN30                                   | -27.4 | -32.7 | -5.4 | (-)                   |
| LAN31                                   | -27.8 | -33.5 | -5.7 | (-)                   |
| LAN33                                   | -28.5 | -32.7 | -4.2 | (-)                   |
| LAN39                                   | -28.1 | -31.8 | -3.8 | (-)                   |
| LAN40M                                  | -27.7 | -31.7 | -4.0 | (-)                   |
| LAN42                                   | -28.4 | -33.3 | -4.9 | (-)                   |
| LAN43R                                  | -28.0 | -33.4 | -5.5 | (-)                   |

|        |       |       |      |     |
|--------|-------|-------|------|-----|
| LAN43M | -27.7 | -33.1 | -5.4 | (-) |
| LAN44  | -27.3 | -31.2 | -3.9 | (-) |
| LAN45  | -26.5 | -32.8 | -6.3 | (-) |
| LAN46  | -27.4 | -33.0 | -5.6 | (-) |
| LAN47  | -28.5 | -32.7 | -4.1 | (-) |
| LAN49  | -28.3 | -32.8 | -4.5 | (-) |
| LAN50  | -28.1 | -29.9 | -1.8 | (-) |
| LAN51  | -25.8 | -31.9 | -6.1 | (-) |

#### Upper Forth Crossing, East Lothian

|      |       |       |      |     |
|------|-------|-------|------|-----|
| UFC4 | -27.6 | -31.7 | -4.2 | (-) |
|------|-------|-------|------|-----|

#### Isle of Man

##### Billown

|        |       |       |      |     |
|--------|-------|-------|------|-----|
| BIL1   | -30.2 | -35.4 | -5.2 | (-) |
| BIL2   | -27.8 | -34.3 | -6.4 | (-) |
| BIL6   | -28.1 | -32.1 | -4.0 | (-) |
| BIL8   | -28.0 | -31.6 | -3.7 | (-) |
| BIL10  | -28.9 | -34.3 | -5.5 | (-) |
| BIL11  | -28.6 | -33.7 | -5.0 | (-) |
| BIL12  | -28.3 | -31.5 | -3.2 | (-) |
| BIL15  | -28.8 | -31.7 | -2.9 | (-) |
| BIL20  | -27.1 | -28.8 | -1.7 | (-) |
| BIL20V | -27.5 | -30.9 | -3.4 | (-) |

*Hebridean, 'Unstan', Impressed, Early Grooved Wares*

#### SECONDARY EXPANSION

#### Mainland Northern Britain

##### Culduthel, Invernesshire

|       |       |       |      |     |
|-------|-------|-------|------|-----|
| CUL1  | -27.5 | -35.0 | -7.5 | (-) |
| CUL4  | -28.7 | -34.0 | -5.3 | (-) |
| CUL4V | -30.9 | -37.2 | -6.3 | (-) |

##### Upper Forth Crossing,

##### Clackmannanshire

|        |       |       |      |     |
|--------|-------|-------|------|-----|
| UFC7   | -28.7 | -34.7 | -5.9 | (-) |
| UFC8   | -30.3 | -35.4 | -5.0 | (-) |
| UFC11  | -27.0 | -33.7 | -6.7 | (-) |
| UFC12  | -29.9 | -34.8 | -4.9 | (-) |
| UFC15  | -27.4 | -33.7 | -6.3 | (-) |
| UFC17  | -29.2 | -34.5 | -5.4 | (-) |
| UFC19  | -30.6 | -33.3 | -2.7 | (-) |
| UFC20V | -30.6 | -33.2 | -2.7 | (-) |
| UFC21  | -28.0 | -33.9 | -5.9 | (-) |
| UFC22  | -29.2 | -34.1 | -4.8 | (-) |
| UFC22V | -29.3 | -33.6 | -4.3 | (-) |

|       |       |       |      |     |
|-------|-------|-------|------|-----|
| UFC23 | -28.9 | -34.5 | -5.7 | (-) |
| UFC24 | -30.0 | -35.5 | -5.5 | (-) |
| UFC25 | -29.6 | -33.9 | -4.3 | (-) |
| UFC27 | -30.2 | -35.6 | -5.4 | (-) |

## Outer Hebrides

### Dunasbroc, Isle of Lewis

|       |       |       |      |     |
|-------|-------|-------|------|-----|
| DB-2  | -26.0 | -33.2 | -7.1 | (-) |
| DB-7  | -27.1 | -29.4 | -2.3 | (-) |
| DB-8  | -27.3 | -32.6 | -5.3 | (-) |
| DB-9  | -27.2 | -32.4 | -5.2 | (-) |
| DB-11 | -27.5 | -30.8 | -3.3 | (-) |
| DB-12 | -27.4 | -32.3 | -4.9 | (-) |
| DB-13 | -26.5 | -31.8 | -5.4 | (-) |
| DB-14 | -27.4 | -29.8 | -2.4 | (-) |
| DB-15 | -26.5 | -32.8 | -6.3 | (-) |
| DB-16 | -24.4 | -32.8 | -8.5 | (-) |
| DB-17 | -27.2 | -32.9 | -5.7 | (-) |
| DB-20 | -27.2 | -32.6 | -5.4 | (-) |
| DB-22 | -26.1 | -32.9 | -6.8 | (-) |
| DB-24 | -26.5 | -32.8 | -6.3 | (-) |
| DB-25 | -25.7 | -32.5 | -6.8 | (-) |
| DB-26 | -26.5 | -32.1 | -5.6 | (-) |
| DB-28 | -26.1 | -30.4 | -4.3 | (-) |
| DB-30 | -26.6 | -31.7 | -5.1 | (-) |

### Loch Olabhat, North Uist

|        |       |       |      |     |
|--------|-------|-------|------|-----|
| LOL2   | -26.0 | -33.2 | -7.1 | (-) |
| LOL4   | -27.1 | -29.4 | -2.3 | (-) |
| LOL5   | -27.3 | -32.6 | -5.3 | (-) |
| LOL8   | -27.2 | -32.4 | -5.2 | (-) |
| LOL14  | -27.5 | -30.8 | -3.3 | (-) |
| LOL14V | -27.4 | -32.3 | -4.9 | (-) |
| LOL23  | -26.5 | -31.8 | -5.4 | (-) |
| LOL25  | -27.4 | -29.8 | -2.4 | (-) |

### Bharpa Langais, South Uist

|      |       |       |      |              |
|------|-------|-------|------|--------------|
| BP1  | -26.6 | -32.1 | -5.5 | LC APAAs, LC |
| BP1V | -28.2 | -30.5 | -2.4 | DHYAs        |
|      |       |       |      | -            |

## Orkney

### Pool, Sanday

|     |       |       |      |     |
|-----|-------|-------|------|-----|
| PL2 | -27.6 | -31.1 | -3.5 | (-) |
|-----|-------|-------|------|-----|

### Braes o'Habreck, Wyre

|      |       |       |      |     |
|------|-------|-------|------|-----|
| HAB6 | -28.3 | -31.5 | -3.1 | (-) |
| HAB7 | n.a.  | n.a.  | n.a. | (-) |

|                                           |       |       |      |      |
|-------------------------------------------|-------|-------|------|------|
| HAB9                                      | n.a.  | n.a.  | n.a. | (-)  |
| HAB15                                     | -27.0 | -33.4 | -6.4 | (-)  |
| HAB17                                     | -27.8 | -30.7 | -3.0 | (-)  |
| <b>Knowes of Trotty, Mainland</b>         |       |       |      |      |
| KOT2                                      | -28.4 | -31.6 | -3.2 | (-)  |
| KOT4                                      | -27.6 | -30.7 | -3.2 | (-)  |
| KOT5                                      | -27.1 | -31.0 | -3.9 | (-)  |
| KOT6                                      | -26.3 | -26.6 | -0.3 | (-)  |
| KOT7                                      | -27.0 | -32.6 | -5.6 | (-)  |
| KOT8                                      | -28.3 | -33.1 | -4.8 | (-)  |
| KOT10                                     | -26.6 | -31.4 | -4.7 | (-)  |
| <b>Stonehall, Mainland<sup>†</sup></b>    |       |       |      |      |
| SHU29                                     | -28.5 | -33.6 | -5.1 | (-)  |
| SHU168                                    | -27.4 | -31.1 | -3.7 | (-)  |
| SHR168                                    | -27.5 | -31.1 | -3.6 | (-)  |
| SHU1230                                   | -28.0 | -31.9 | -3.9 | (-)  |
| SHU7118                                   | -27.5 | -32.8 | -5.3 | (-)  |
| SHU7119                                   | -27.5 | -31.8 | -4.3 | (-)  |
| SHU7055                                   | -28.3 | -33.3 | -5.0 | (-)  |
| SHR7055                                   | -28.5 | -33.5 | -5.0 | (-)  |
| SHU7064                                   | -27.7 | -32.6 | -4.9 | n.a. |
| SHU7094                                   | -27.5 | -32.0 | -4.5 | (-)  |
| SHU7145                                   | -28.7 | -32.1 | -3.4 | n.a. |
| SH1800                                    | -24.6 | -31.1 | -6.5 | n.a. |
| SH2300                                    | -27.8 | -30.3 | -2.5 | n.a. |
| SH2430                                    | -27.5 | -29.9 | -2.4 | (-)  |
| SH2499                                    | -28.4 | -32.6 | -4.2 | (-)  |
| <b>Widford Hill, Mainland<sup>†</sup></b> |       |       |      |      |
| WHU6                                      | -26.8 | -32.8 | -6.0 | (-)  |
| WHU13                                     | -26.4 | -32.9 | -6.5 | (-)  |
| WHU286                                    | -27.4 | -32.9 | -5.5 | (-)  |
| WHU290                                    | -27.9 | -33.3 | -5.4 | (-)  |
| WHU399                                    | -26.6 | -31.0 | -4.4 | (-)  |
| WHU567                                    | -28.4 | -33.8 | -5.4 | (-)  |
| WHU636                                    | -26.9 | -32.9 | -6.0 | (-)  |
| WHR636                                    | -28.3 | -33.1 | -4.8 | (-)  |
| WHU912                                    | -26.8 | -32.6 | -5.8 | n.a. |
| WHU915                                    | -27.2 | -33.0 | -5.8 | n.a. |
| WHU995                                    | -26.9 | -30.7 | -3.8 | (-)  |
| <b>Quanterness, Mainland</b>              |       |       |      |      |
| QAN2                                      | -28.9 | -33.5 | -4.6 | (-)  |
| QAN3                                      | -28.3 | -31.9 | -3.6 | (-)  |
| QAN4                                      | -28.9 | -32.8 | -3.9 | (-)  |
| QAN5                                      | -27.1 | -33.1 | -5.9 | (-)  |
| <b>Shetland</b>                           |       |       |      |      |

**Scord of Brouster**

|      |      |      |      |     |
|------|------|------|------|-----|
| SOB6 | n.a. | n.a. | n.a. | (-) |
|------|------|------|------|-----|

LATE NEOLITHIC

*Grooved Ware, Ronaldsway Ware***Mainland Northern Britain****Mountcastle Quarry**

|       |       |       |      |     |
|-------|-------|-------|------|-----|
| MQLF2 | -27.7 | -29.8 | -2.0 | (-) |
| MQLF3 | -28.9 | -29.8 | -0.9 | (-) |

**Orkney****Pool, Sanday**

|     |       |       |      |     |
|-----|-------|-------|------|-----|
| PL1 | n.a.  | n.a.  | n.a. | (-) |
| PL3 | -25.8 | -29.7 | -3.8 | (-) |
| PL5 | -28.7 | -32.0 | -3.4 | (-) |
| PL7 | -27.8 | -33.2 | -5.4 | (-) |

**Ness of Brodgar, Mainland**

|       |       |       |      |     |
|-------|-------|-------|------|-----|
| NEB1  | -26.8 | -29.1 | -2.3 | (-) |
| NEB2  | -26.7 | -30.4 | -3.6 | (-) |
| NEB3  | n.a.  | n.a.  | n.a. | (-) |
| NEB4  | -27.4 | -30.1 | -2.7 | (-) |
| NEB6  | -27.5 | -29.4 | -1.9 | (-) |
| NEB7  | -27.3 | -31.7 | -4.5 | (-) |
| NEB8  | -27.6 | -31.3 | -3.7 | (-) |
| NEB10 | -27.2 | -32.0 | -4.8 | (-) |
| NEB13 | -28.1 | -30.7 | -2.6 | (-) |
| NEB15 | -27.0 | -30.8 | -3.8 | (-) |
| NEB16 | -26.5 | -30.5 | -4.0 | (-) |
| NEB17 | -27.4 | -32.3 | -4.8 | (-) |
| NEB18 | -26.7 | -31.0 | -4.3 | (-) |
| NEB19 | -26.7 | -30.0 | -3.3 | (-) |
| NEB21 | -26.6 | -29.0 | -2.5 | (-) |
| NEB22 | n.a.  | n.a.  | n.a. | (-) |
| NEB23 | -27.6 | -30.9 | -3.3 | (-) |
| NEB25 | -30.0 | -29.1 | 0.8  | (-) |
| NEB26 | -26.6 | -29.4 | -2.8 | (-) |
| NEB27 | -26.4 | -31.0 | -4.6 | (-) |
| NEB28 | -28.1 | -31.4 | -3.4 | (-) |
| NEB30 | -27.3 | -30.3 | -3.0 | (-) |

**Skara Brae, Mainland<sup>†</sup>**

|        |       |       |      |      |
|--------|-------|-------|------|------|
| SBG27  | -27.2 | -29.2 | -2.0 | (-)  |
| SBG40  | -25.0 | -29.9 | -4.9 | n.a. |
| SBG84  | -27.4 | -30.4 | -3.0 | n.a. |
| SBG97  | -28.0 | -30.8 | -2.8 | (-)  |
| SBG104 | -26.8 | -30.0 | -3.2 | (-)  |

|                                           |       |       |      |      |
|-------------------------------------------|-------|-------|------|------|
| SBG234                                    | -27.7 | -31.1 | -3.4 | (-)  |
| SBR234                                    | -27.0 | -31.5 | -4.5 | n.a. |
| SBG240                                    | -27.1 | -27.1 | 0.0  | n.a. |
| SBG317                                    | -27.8 | -30.5 | -2.7 | (-)  |
| SBG332                                    | -27.0 | -29.8 | -2.8 | n.a. |
| SBG338                                    | -27.4 | -30.5 | -3.1 | (-)  |
| SBG340                                    | -27.0 | -30.9 | -3.9 | (-)  |
| SBG349                                    | -26.3 | -32.9 | -6.6 | (-)  |
| SBG385                                    | -27.8 | -31.5 | -3.7 | (-)  |
| SBG507                                    | -25.6 | -30.1 | -4.5 | (-)  |
| SBG761                                    | -27.6 | -31.1 | -3.5 | (-)  |
| SBG801                                    | -27.3 | -32.2 | -4.9 | n.a. |
| SBG1000                                   | -27.9 | -32.5 | -4.6 | (-)  |
| SBG1051                                   | -26.8 | -30.4 | -3.6 | (-)  |
| SBG1054                                   | -26.5 | -30.9 | -4.4 | (-)  |
| SBG1055                                   | -27.1 | -30.9 | -3.8 | (-)  |
| SBG1057                                   | -25.9 | -32.2 | -6.3 | (-)  |
| SBG1542                                   | -26.4 | -31.5 | -5.1 | (-)  |
| SBG1602                                   | -27.8 | -30.7 | -2.9 | (-)  |
| SBG1639                                   | -27.5 | -31.8 | -4.3 | (-)  |
| SBG1754                                   | -27.4 | -30.8 | -3.4 | (-)  |
| SBG3010                                   | -26.0 | -29.7 | -3.7 | (-)  |
| SBG3026                                   | -31.8 | -30.2 | 1.6  | (-)  |
| SBG3111                                   | -26.4 | -29.4 | -3.0 | (-)  |
| SBG3137                                   | -27.8 | -30.8 | -3.0 | n.a. |
| SBG3142                                   | -27.1 | -30.7 | -3.6 | (-)  |
| SBG3191                                   | -27.3 | -30.6 | -3.3 | (-)  |
| SBG3193                                   | -27.5 | -30.4 | -2.9 | n.a. |
| SBG3198                                   | -27.1 | -29.9 | -2.8 | (-)  |
| SBG3241                                   | -27.8 | -30.7 | -2.9 | (-)  |
| SBG5149                                   | -27.4 | -30.6 | -3.2 | (-)  |
| <b>Stonehall, Mainland<sup>†</sup></b>    |       |       |      |      |
| SHG393                                    | -27.6 | -31.6 | -4.0 | n.a. |
| SHG2106                                   | -26.8 | -32.0 | -5.2 |      |
| SHG2107                                   | -28.2 | -31.6 | -3.4 |      |
| SHG2134                                   | -27.9 | -28.6 | -0.7 | (-)  |
| SHG2150                                   | -27.4 | -30.0 | -2.6 | (-)  |
| SHG2625                                   | -27.9 | -32.1 | -4.2 | n.a. |
| SHG3606                                   | -28.4 | -31.6 | -3.2 | (-)  |
| SHG4124                                   | -27.7 | -30.7 | -3.0 | (-)  |
| SHG6077                                   | -27.2 | -31.8 | -4.6 | n.a. |
| SHG6260                                   | -26.8 | -33.6 | -6.8 | n.a. |
| SHG6261                                   | -27.2 | -30.0 | -2.8 | (-)  |
| SHG6306                                   | -27.1 | -30.4 | -3.3 | (-)  |
| SHR6306                                   | -27.0 | -30.3 | -3.3 | (-)  |
| SHR6305                                   | -27.1 | -32.0 | -4.9 | (-)  |
| <b>Crossiecrown, Mainland<sup>†</sup></b> |       |       |      |      |
| CCG19                                     | -28.1 | -33.7 | -5.6 | (-)  |

|        |       |       |      |      |
|--------|-------|-------|------|------|
| CCG150 | -26.6 | -32.4 | -5.8 | (-)  |
| CCG738 | -29.6 | -31.9 | -2.3 | (-)  |
| CCG899 | -28.0 | -31.7 | -3.7 | (-)  |
| CCG937 | -28.1 | -30.2 | -2.1 | n.a. |

**Links of Noltland, Westray<sup>†</sup>**

|        |       |       |      |      |
|--------|-------|-------|------|------|
| LON1   | -26.4 | -30.2 | -3.8 | (-)  |
| LON2   | -25.3 | -32.0 | -6.8 | (-)  |
| LON3   | -24.9 | -27.8 | -2.9 | (-)  |
| LON4   | -26.2 | -32.3 | -6.1 | (-)  |
| LON5   | -26.0 | -30.5 | -4.5 | (-)  |
| LON7   | -27.0 | -29.7 | -2.7 | (-)  |
| LON10  | -26.4 | -32.5 | -6.1 | (-)  |
| LON11  | -27.4 | -29.9 | -2.6 | (-)  |
| LON12  | -26.1 | -31.2 | -5.0 | (-)  |
| LON13  | -25.5 | -29.5 | -4.0 | (-)  |
| LON14  | -25.8 | -32.1 | -6.3 | (-)  |
| LON16  | -25.1 | -28.5 | -3.3 | (-)  |
| LON18  | -25.5 | -31.1 | -5.6 | (-)  |
| LON19  | -26.1 | -29.3 | -3.2 | (-)  |
| LON23  | -26.7 | -28.8 | -2.1 | (-)  |
| LON24  | -25.8 | -31.7 | -5.9 | (-)  |
| LON30  | -27.6 | -30.5 | -2.9 | (-)  |
| LON31  | -24.2 | -30.7 | -6.5 | (-)  |
| LON32  | -27.3 | -32.0 | -4.7 | (-)  |
| LON33  | -25.8 | -32.4 | -6.6 | (-)  |
| LON34  | -26.0 | -32.0 | -6.0 | (-)  |
| LON35  | -27.9 | -30.0 | -2.1 | (-)  |
| LON36  | -28.5 | -30.0 | -1.5 | (-)  |
| LON38  | -28.7 | -30.5 | -1.8 | (-)  |
| LON39  | -27.4 | -29.4 | -2.0 | (-)  |
| LON40  | -26.7 | -30.2 | -3.5 | (-)  |
| LON40V | -26.1 | -29.4 | -3.3 | (-)  |
| LON41  | -26.4 | -29.3 | -2.9 | (-)  |
| LON42  | -26.9 | -29.7 | -2.8 | (-)  |
| LON43  | -28.6 | -33.7 | -5.1 | (-)  |
| LON44V | -26.6 | -28.8 | -2.3 | (-)  |
| LON46  | -26.1 | -29.6 | -3.5 | (-)  |
| LON46V | -27.3 | -30.5 | -3.3 | (-)  |
| LON50  | -26.8 | -29.6 | -2.7 | (-)  |
| LON52  | -27.7 | -30.6 | -2.9 | (-)  |
| LON52V | -26.6 | -29.6 | -3.1 | (-)  |
| LNG1   | -26.4 | -29.0 | -2.6 | n.a. |
| LNG2   | -25.7 | -31.5 | -5.8 | n.a. |
| LNG3   | -27.1 | -30.3 | -3.2 | n.a. |
| LNG4   | -26.7 | -33.4 | -6.7 | n.a. |
| LNG6   | -27.2 | -30.1 | -2.9 | n.a. |
| LNG7   | -26.5 | -28.9 | -2.4 | n.a. |
| LNG8   | -25.3 | -27.0 | -1.7 | n.a. |
| LNG9   | -26.5 | -29.0 | -2.5 | n.a. |

|       |       |       |      |      |
|-------|-------|-------|------|------|
| LNG10 | -26.6 | -30.7 | -4.1 | n.a. |
| LNG11 | -27.0 | -31.1 | -4.1 | n.a. |
| LNG12 | -27.1 | -31.9 | -4.8 | n.a. |
| LNG14 | -26.3 | -32.3 | -6.0 | n.a. |
| LNG15 | -26.0 | -31.8 | -5.8 | n.a. |

## Shetland

### Scord of Brouster, Mainland

|       |       |       |      |     |
|-------|-------|-------|------|-----|
| SOB1  | -27.0 | -33.6 | -6.6 | (-) |
| SOB3  | -27.6 | -32.9 | -5.3 | (-) |
| SOB4  | -27.7 | -33.7 | -6.1 | (-) |
| SOB9  | -27.5 | -31.6 | -5.9 | (-) |
| SOB10 | -27.2 | -31.5 | -4.2 | (-) |
| SOB11 | -27.0 | -30.4 | -4.4 | (-) |
| SOB14 | -27.6 | -32.6 | -3.4 | (-) |
| SOB15 | -28.4 | -32.6 | -5.0 | (-) |
| SOB16 | -28.3 | -33.1 | -4.1 | (-) |
| SOB17 | -27.4 | -31.8 | -4.8 | (-) |
| SOB18 | -27.8 | -32.2 | -4.4 | (-) |
| SOB19 | -27.8 | -32.8 | -4.4 | (-) |
| SOB20 | -27.7 | -32.4 | -5.1 | (-) |
| SOB21 | -28.0 | -30.4 | -4.7 | (-) |
| SOB22 | -27.7 | -32.5 | -2.4 | (-) |

## Isle of Man

### Billown

|       |       |       |      |     |
|-------|-------|-------|------|-----|
| BIL21 | -28.4 | -33.3 | -4.8 | (-) |
|-------|-------|-------|------|-----|

### Ronaldsway

|       |       |       |      |     |
|-------|-------|-------|------|-----|
| RW1   | -26.1 | -31.8 | -5.6 | (-) |
| RW2   | -27.1 | -33.1 | -6.0 | (-) |
| RW3   | -27.4 | -33.1 | -5.7 | (-) |
| RW4   | n.a.  | n.a.  | n.a. | (-) |
| RW7   | -25.8 | -27.1 | -1.3 | (-) |
| RW8   | -27.4 | -32.8 | -5.5 | (-) |
| RW10  | -27.7 | -33.9 | -6.2 | (-) |
| RW14  | -28.5 | -33.9 | -5.4 | (-) |
| RW17  | -26.7 | -32.1 | -5.4 | (-) |
| RW18  | -27.3 | -32.9 | -5.6 | (-) |
| RW20  | -30.3 | -34.8 | -4.5 | (-) |
| RW21  | -28.5 | -33.8 | -5.3 | (-) |
| RW24  | -27.2 | -32.7 | -5.5 | (-) |
| RW25  | n.a.  | n.a.  | n.a. | (-) |
| RW30  | -25.5 | -31.9 | -6.5 | (-) |
| RW30V | -26.6 | -33.1 | -6.5 | (-) |

## Glencrutchery



|      |       |       |      |     |
|------|-------|-------|------|-----|
| GC5  | -31.4 | -35.0 | -3.5 | (-) |
| GC14 | -31.4 | -34.3 | -2.9 | (-) |
| GC23 | -29.1 | -31.9 | -2.8 | (-) |
| GC28 | -29.7 | -34.2 | -4.5 | (-) |

## BRONZE AGE

### Outer Hebrides

#### Cladh Hallan, South Uist

|      |       |       |      |     |
|------|-------|-------|------|-----|
| CH2  | -26.2 | -28.5 | -2.3 | (-) |
| CH3  | -27.7 | -29.0 | -1.4 | (-) |
| CH4  | -27.6 | -32.6 | -4.9 | (-) |
| CH5  | -27.7 | -33.0 | -5.3 | (-) |
| CH6  | -26.8 | -32.5 | -5.7 | (-) |
| CH8  | -25.9 | -28.7 | -2.7 | (-) |
| CH12 | -27.2 | -31.8 | -4.6 | (-) |
| CH16 | -27.3 | -30.9 | -3.6 | (-) |
| CH17 | -28.2 | -31.3 | -3.0 | (-) |

### Orkney

#### Toft's Ness, Sanday

|      |       |       |      |     |
|------|-------|-------|------|-----|
| TN1  | -27.2 | -31.0 | -3.9 | (-) |
| TN4  | -29.7 | -32.4 | -2.7 | (-) |
| TN6  | -27.9 | -31.4 | -3.6 | (-) |
| TN8  | -29.6 | -30.8 | -1.2 | (-) |
| TN10 | -29.4 | -33.8 | -4.4 | (-) |
| TN11 | -28.3 | -32.9 | -4.7 | (-) |
| TN12 | -28.2 | -32.0 | -3.9 | (-) |
| TN16 | -28.7 | -30.1 | -1.4 | (-) |

#### Linga Fiold, Mainland

|      |       |       |      |     |
|------|-------|-------|------|-----|
| LIN1 | -28.2 | -31.1 | -2.9 | (-) |
| LIN2 | -27.8 | -33.2 | -5.3 | (-) |
| LIN3 | -29.0 | -33.5 | -4.6 | (-) |
| LIN5 | -28.3 | -31.4 | -3.1 | (-) |
| LIN6 | -28.0 | -32.3 | -4.3 | (-) |

### Shetland

#### Scord of Brouster, Mainland

|      |       |       |      |     |
|------|-------|-------|------|-----|
| SOB7 | -26.8 | -32.7 | -5.9 | (-) |
|------|-------|-------|------|-----|

#### Sumburgh

|      |       |       |      |     |
|------|-------|-------|------|-----|
| SUM1 | -26.7 | -29.1 | -2.4 | (-) |
| SUM3 | -25.8 | -29.7 | -3.9 | (-) |
| SUM5 | -26.1 | -29.7 | -3.6 | (-) |
| SUM6 | -26.5 | -30.1 | -3.6 | (-) |
| SUM7 | -27.0 | -32.1 | -5.1 | (-) |

|        |       |       |      |     |
|--------|-------|-------|------|-----|
| SUM8   | -26.4 | -29.8 | -3.4 | (-) |
| SUM9   | -27.2 | -29.6 | -2.4 | (-) |
| SUM10  | -26.6 | -30.5 | -4.0 | (-) |
| SUM13  | -26.6 | -31.3 | -4.6 | (-) |
| SUM14  | -26.6 | -31.6 | -5.0 | (-) |
| SUM15  | -26.7 | -30.3 | -3.5 | (-) |
| SUM16  | -26.9 | -30.5 | -3.5 | (-) |
| SUM17  | -26.6 | -31.5 | -4.8 | (-) |
| SUM19  | -26.4 | -31.0 | -4.6 | (-) |
| SUM20m | -26.6 | -29.5 | -2.8 | (-) |
| SUM20b | -26.0 | -31.2 | -5.2 | (-) |
| SUM21  | -26.5 | -30.5 | -4.0 | (-) |

## Iron Age

### Outer Hebrides

#### Dun Vulcan, South Uist

|       |       |       |      |     |
|-------|-------|-------|------|-----|
| DUV1  | -27.5 | -32.8 | -5.3 | (-) |
| DUV2  | -27.5 | -30.8 | -3.3 | (-) |
| DUV3  | -26.0 | -32.1 | -6.1 | (-) |
| DUV6  | -26.3 | -29.6 | -3.3 | (-) |
| DUV8  | -26.6 | -30.4 | -3.8 | (-) |
| DUV9  | -26.3 | -29.9 | -3.6 | (-) |
| DUV14 | -27.8 | -32.6 | -4.8 | (-) |
| DUV15 | -27.5 | -32.0 | -4.5 | (-) |
| DUV16 | -26.8 | -29.2 | -2.4 | (-) |
| DUV19 | -26.6 | -30.5 | -3.9 | (-) |
| DUV21 | -25.7 | -29.9 | -4.2 | (-) |
| DUV22 | -26.5 | -32.1 | -5.6 | (-) |
| DUV24 | -25.6 | -30.8 | -5.2 | (-) |
| DUV27 | -27.5 | -32.5 | -4.9 | (-) |
| DUV28 | -25.5 | -30.8 | -5.3 | (-) |

#### Baile Sear, North Uist

|      |       |       |      |     |
|------|-------|-------|------|-----|
| BS1  | -26.9 | -30.5 | -3.6 | (-) |
| BS2  | -27.2 | -31.7 | -4.5 | (-) |
| BS4  | -27.2 | -29.0 | -1.9 | (-) |
| BS5  | -26.6 | -29.7 | -3.2 | (-) |
| BS6  | n.a.  | n.a.  | n.a. | (-) |
| BS7  | -27.0 | -31.9 | -4.9 | (-) |
| BS8  | -26.5 | -29.5 | -3.0 | (-) |
| BS9  | n.a.  | n.a.  | n.a. | (-) |
| BS10 | n.a.  | n.a.  | n.a. | (-) |
| BS11 | -27.1 | -31.9 | -4.8 | (-) |
| BS12 | n.a.  | n.a.  | n.a. | (-) |
| BS14 | -26.7 | -31.0 | -4.4 | (-) |
| BS15 | -27.7 | -30.2 | -2.5 | (-) |
| BS18 | -25.8 | -31.3 | -5.5 | (-) |

|                                     |       |       |      |              |
|-------------------------------------|-------|-------|------|--------------|
| BS19                                | -26.3 | -29.1 | -2.8 | (-)          |
| BS20                                | -27.0 | -32.7 | -5.7 | (-)          |
| BS21                                | -28.0 | -32.4 | -4.4 | (-)          |
| BS23                                | -26.4 | -29.3 | -2.9 | (-)          |
| BS24                                | -26.1 | -32.5 | -6.4 | (-)          |
| BS8V                                | -27.0 | -29.6 | -2.6 | (-)          |
| <b>Dun Arnistean, Isle of Lewis</b> |       |       |      |              |
| DAR1                                | -26.7 | -29.7 | -3.0 | (-)          |
| DAR3                                | n.a.  | n.a.  | n.a. | (-)          |
| DAR7                                | -27.3 | -30.8 | -3.5 | (-)          |
| DAR8                                | -27.7 | -31.4 | -3.7 | (-)          |
| DAR9                                | n.a.  | n.a.  | n.a. | (-)          |
| <b>Bornais, South Uist</b>          |       |       |      |              |
| BN19                                | -27.0 | -30.2 | -3.2 | (-)          |
| BN17                                | -26.9 | -30.8 | -3.9 | (-)          |
| BN20                                | -27.1 | -31.0 | -3.9 | (-)          |
| BN25                                | -27.6 | -32.5 | -4.8 | (-)          |
| BN-26                               | n.a.  | n.a.  | n.a. | (-)          |
| BN58                                | -28.3 | -32.0 | -3.7 | (-)          |
| BN59                                | n.a.  | n.a.  | n.a. | (-)          |
| BN62                                | -27.6 | -32.5 | -4.8 | (-)          |
| BN66                                | -27.4 | -30.3 | -2.9 | (-)          |
| BN66v                               | -27.4 | -30.3 | -2.9 | (-)          |
| BN68                                | -26.8 | -28.5 | -1.6 | (-)          |
| BN69                                | -26.9 | -31.0 | -4.1 | (-)          |
| BN70                                | -26.8 | -29.9 | -3.1 | LC APAAs     |
| BN70V                               | -26.8 | -29.3 | -2.5 | (-)          |
| BN71                                | -27.4 | -31.7 | -4.3 | (-)          |
| BN71V                               | -26.9 | -30.8 | -3.8 | (-)          |
| BN72                                | -28.1 | -33.8 | -5.8 | (-)          |
| BN74                                | -26.6 | -29.4 | -2.8 | LC APAAs     |
| BN74V                               | -26.9 | -29.8 | -2.9 | (-)          |
| BN76                                | -26.8 | -29.3 | -2.5 | (-)          |
| BN77                                | -26.9 | -29.9 | -3.1 | (-)          |
| BN78V                               | -27.0 | -29.7 | -2.7 | (-)          |
| BN79                                | -26.8 | -30.0 | -3.2 | (-)          |
| BN80                                | -28.3 | -32.5 | -4.3 | (-)          |
| BN82                                | -26.8 | -29.0 | -2.2 | (-)          |
| BN83                                | -27.4 | -30.6 | -3.3 | LC DHYAs     |
| BN84                                | -28.0 | -30.4 | -2.4 | (-)          |
| BN86                                | -26.8 | -29.4 | -2.5 | (-)          |
| BN87                                | -26.8 | -30.4 | -3.6 | LC APAAs     |
| BN87V                               | -27.5 | -30.7 | -3.2 | (-)          |
|                                     |       |       |      | LC APAAs, LC |
| BN88                                | -24.2 | -25.5 | -1.3 | DHYAs        |
| BN88V                               | -25.1 | -28.5 | -3.4 | (-)          |
| BN89                                | -26.8 | -29.4 | -2.5 | (-)          |

## Orkney

### Toft's Ness, Sanday

|      |       |       |      |          |
|------|-------|-------|------|----------|
| TN19 | -25.7 | -29.4 | -3.7 | LC DHYAs |
| TN22 | -26.5 | -30.4 | -3.9 | (-)      |
| TN25 | -26.0 | -28.5 | -2.5 | (-)      |
| TN27 | -25.8 | -29.4 | -3.6 | (-)      |
| TN34 | -26.6 | -31.0 | -4.4 | LC APAAs |

## Shetland

### Scalloway, Mainland

|       |       |       |      |                       |
|-------|-------|-------|------|-----------------------|
| SCA4v | -27.6 | -27.7 | -0.1 | LC APAAs, LC<br>DHYAs |
| SCA1  | -27.6 | -32.7 | -5.1 | (-)                   |
| SCA2  | -27.8 | -29.4 | -1.6 | LC APAAs, LC<br>DHYAs |
| SCA3  | -27.6 | -27.7 | -0.1 | (-)                   |
| SCA4  | -27.6 | -32.7 | -5.1 | LC DHYAs              |
| SCA5  | -27.8 | -29.4 | -1.6 | (-)                   |
| SCA6  | -27.2 | -31.1 | -3.9 | (-)                   |
| SCA8  | -28.1 | -28.1 | -0.0 | (-)                   |
| SCA10 | -27.4 | -31.6 | -4.2 | (-)                   |
| SCA12 | -27.4 | -31.3 | -3.9 | (-)                   |
| SCA13 | -27.7 | -31.9 | -4.2 | (-)                   |
| SCA14 | -27.5 | -31.3 | -3.8 | (-)                   |
| SCA15 | -27.0 | -30.8 | -3.8 | (-)                   |
| SCA17 | n.a.  | n.a.  | n.a. | (-)                   |
| SCA18 | n.a.  | n.a.  | n.a. | (-)                   |
| SCA19 | -27.5 | -32.1 | -4.6 | (-)                   |
| SCA20 | -27.2 | -31.9 | -4.7 | (-)                   |
| SCA23 | n.a.  | n.a.  | na   | (-)                   |
| SCA25 | -27.3 | -32.2 | -4.8 | (-)                   |

## Viking/Norse

### Outer Hebrides

#### Cille Pheadair, South Uist

|      |       |       |      |                       |
|------|-------|-------|------|-----------------------|
| KP1  | -24.3 | -27.2 | -3.0 | LC APAAs              |
| KP2  | -27.0 | -29.6 | -2.5 | (-)                   |
| KP3  | -26.9 | -29.7 | -2.8 | (-)                   |
| KP4  | -26.5 | -31.3 | -4.8 | (-)                   |
| KP5M | -27.7 | -30.4 | -2.7 | LC APAAs, LC<br>DHYAs |
| KP5U | -27.3 | -29.3 | -1.9 | LC APAAs              |
| KP6  | -27.2 | -31.8 | -4.7 | LC APAAs              |
| KP7  | -27.0 | -31.5 | -4.5 | (-)                   |
| KP8  | -25.8 | -30.4 | -4.6 | LC APAAs, LC<br>DHYAs |

|                            |       |       |      |              |
|----------------------------|-------|-------|------|--------------|
| KP9                        | -27.7 | -30.9 | -3.2 | (-)          |
| KP10                       | -26.2 | -31.7 | -5.5 | LC APAAs     |
| KP11                       | -24.8 | -29.6 | -4.8 | (-)          |
| KP12                       | -26.6 | -28.9 | -2.3 | (-)          |
| KP14                       | -27.6 | -31.0 | -3.4 | (-)          |
| KP19                       | -27.3 | -31.2 | -3.9 | (-)          |
|                            | n.a.  | n.a.  | n.a. | LC APAAs, LC |
| KP20                       |       |       |      | DHYAs        |
| KP7vi                      | n.a.  | n.a.  | n.a. | (-)          |
| KP 2v                      | n.a.  | n.a.  | n.a. | LC APAAs     |
| <b>Bornais, South Uist</b> |       |       |      |              |
| BN8                        | -27.6 | -33.4 | -5.8 | (-)          |
| BN8V                       | n.a.  | n.a.  | n.a. | (-)          |
| BN28V                      | n.a.  | n.a.  | n.a. | LC APAAs     |
| BN29                       | -27.0 | -31.3 | -4.3 | (-)          |
| BN33                       | -27.6 | -33.6 | -6.0 | (-)          |
| BN34                       | -26.3 | -30.5 | -4.2 | (-)          |
| BN34V                      | -25.0 | -28.7 | -3.6 | LC APAAs     |
|                            |       |       |      | LC APAAs, LC |
| BN35                       | -25.4 | -31.4 | -6.0 | DHYAs        |
| BN-35V                     | n.a.  | n.a.  | n.a. | LC APAAs     |
|                            |       |       |      | LC APAAs, LC |
| BN36                       | -27.3 | -31.8 | -4.5 | DHYAs        |
| BN38                       | -25.7 | -29.4 | -3.7 | LC APAAs     |
| BN39                       | -27.6 | -31.8 | -4.2 | LC APAAs     |
| BN39V                      | n.a.  | n.a.  | n.a. | (-)          |
| BN44                       | -26.9 | -30.1 | -3.2 | (-)          |
| BN45                       | n.a.  | n.a.  | n.a. | (-)          |
| BN46                       | -26.1 | -31.2 | -5.1 | (-)          |
| BN46V                      | n.a.  | n.a.  | n.a. | (-)          |
| BN47                       | -28.4 | -33.6 | -5.2 | (-)          |
| BN48                       | n.a.  | n.a.  | n.a. | (-)          |
| BN49                       | -27.2 | -31.6 | -4.5 | (-)          |
| BN51                       | -26.5 | -28.9 | -2.5 | (-)          |
| BN52                       | -26.5 | -29.1 | -2.6 | LC APAAs     |
| BN52V                      | n.a.  | n.a.  | n.a. | (-)          |
| BN53                       | -26.4 | -29.4 | -3.  | LC APAAs     |
| BN54                       | -26.5 | -28.4 | -2.0 | (-)          |
|                            |       |       |      | LC APAAs, LC |
| BN55                       | -24.7 | -28.2 | -3.5 | DHYAs        |
| BN90                       | -26.4 | -29.9 | -3.6 | (-)          |
|                            |       |       |      | LC APAAs, LC |
| BN91                       | -24.3 | -27.9 | -3.6 | DHYAs        |
| BN92                       | -27.6 | -30.9 | -3.4 | (-)          |
| BN93                       | -26.4 | -30.9 | -4.6 | LC APAAs     |
| BN94                       | -26.5 | -28.7 | -2.3 | (-)          |
| BN95                       | -26.6 | -29.3 | -2.7 | (-)          |
| BN96V                      | -26.9 | -31.2 | -4.3 | (-)          |
| BN97                       | -27.4 | -30.3 | -2.9 | (-)          |

|        |       |       |      |              |
|--------|-------|-------|------|--------------|
| BN99   | -29.0 | -30.5 | -1.5 | (-)          |
| BN100  | -28.9 | -30.5 | -1.6 | (-)          |
| BN101  | -28.1 | -32.2 | -4.2 | (-)          |
| BN103  | -28.1 | -30.1 | -2.1 | (-)          |
| BN104  | -27.3 | -30.9 | -3.7 | (-)          |
|        |       |       |      | LC APAAs, LC |
| BN105  | -26.3 | -31.7 | -5.4 | DHYAs        |
| BN107  | -25.9 | -32.3 | -6.4 | (-)          |
| BN108  | -27.5 | -32.7 | -5.2 | (-)          |
| BN110  | -25.4 | -25.9 | -0.5 | LC APAAs     |
| BN111V | -26.8 | -32.4 | -5.6 | (-)          |
| BN115  | -27.2 | -31.0 | -3.8 | (-)          |
| BN115V | -27.8 | -30.6 | -2.8 | (-)          |
| BN117  | -27.3 | -30.1 | -2.8 | (-)          |
| BN118  | -26.7 | -30.1 | -3.4 | (-)          |
| BN121  | -26.8 | -32.0 | -5.2 | (-)          |
| BN122  | -28.0 | -30.8 | -2.8 | (-)          |
| BN123  | -26.5 | -31.8 | -5.4 | (-)          |
| BN123V | -26.9 | -31.4 | -4.5 | (-)          |
| BN124  | -27.2 | -29.8 | -2.6 | (-)          |
| BN124V | -27.3 | -29.7 | -2.4 | (-)          |
| BN125  | -28.2 | -30.7 | -2.5 | (-)          |
| BN126  | -28.2 | -32.5 | -4.4 | (-)          |
| BN126V | -27.1 | -32.4 | -5.3 | n.a.         |
| BN130  | -28.3 | -33.1 | -4.8 | (-)          |
| BN131  | -26.8 | -30.8 | -4.0 | (-)          |

## Shetland

### Jarlshof, Mainland

|        |       |       |      |              |
|--------|-------|-------|------|--------------|
| JAR1   | -22.2 | -21.8 | 0.4  | LC APAAs     |
| JAR2   | -22.3 | -22.5 | -0.2 | LC APAAs     |
| JAR3   | -22.5 | -25.6 | -3.1 | LC APAAs     |
| JAR5   | -27.5 | -30.5 | -3.0 | (-)          |
|        |       |       |      | LC APAAs, LC |
| JAR6   | -23.2 | -25.3 | -2.1 | DHYAs        |
|        |       |       |      | LC APAAs, LC |
| JAR7   | -23.6 | -24.7 | -1.1 | DHYAs        |
|        |       |       |      | LC APAAs, LC |
| JAR8   | -22.7 | -22.4 | 0.3  | DHYAs        |
| JAR12  | -26.3 | -28.1 | -1.9 | (-)          |
|        |       |       |      | LC APAAs, LC |
| JAR13  | -22.6 | -24.3 | -1.7 | DHYAs        |
|        |       |       |      | LC APAAs, LC |
| JAR14  | -26.1 | -32.8 | -6.6 | DHYAs        |
| JAR14V | -24.7 | -31.7 | -7.0 | LC APAAs     |
| JAR15V | -22.2 | -21.2 | 1.0  | LC APAAs     |
| JAR16  | -27.4 | -30.1 | -2.7 | LC APAAs     |
| JAR17  | -25.2 | -29.0 | -3.9 | (-)          |
| JAR18  | -21.6 | -23.6 | -2.0 | LC APAAs     |

|        |       |       |      |                       |
|--------|-------|-------|------|-----------------------|
| JAR19  | -23.8 | -24.0 | -0.2 | LC APAAs, LC<br>DHYAs |
| JAR21  | -21.7 | -21.4 | 0.3  | (-)                   |
| JAR22  | -24.1 | -27.0 | -2.9 | LC APAAs, LC<br>DHYAs |
| JAR22V | -25.6 | -29.2 | -3.6 | LC APAAs              |

---
